# Supplementary material for: CSF-1 signals directly to renal tubular epithelial cells to mediate repair in mice
Source: JCI journal article supplement (doi:10.1172/jci39087), 2009-07-01
Supplement: sd1 [file 1]

## A. Tubular Histopathology

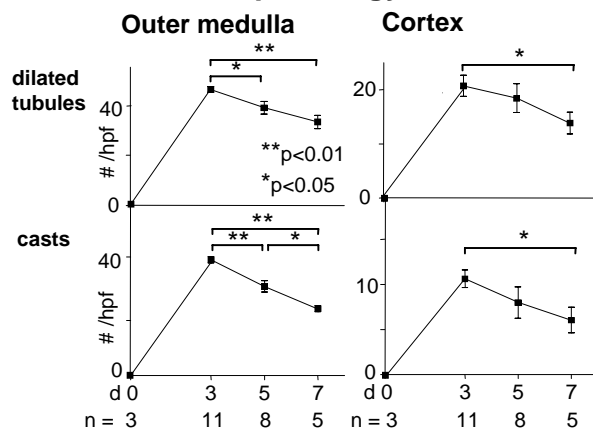

## B. Tubular Proliferation

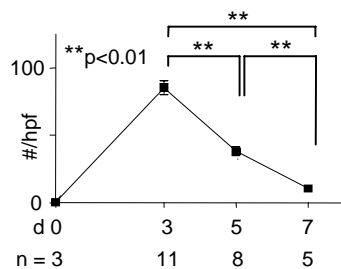

**Supplement Figure 1. Tubular pathology and proliferation following I/R peaks at day 3 and returns rapidly to normal values.** A. Tubular dilation and casts are readily apparent at 3 days and progressively decline at days 5 and 7. B. Tubular proliferation (Ki67) also peaks at 3 days, but returns to normal more rapidly than tubules. Values were determined in 10 hpf. Means  $\pm$  SEM.

KIM-1 Expression in TEC

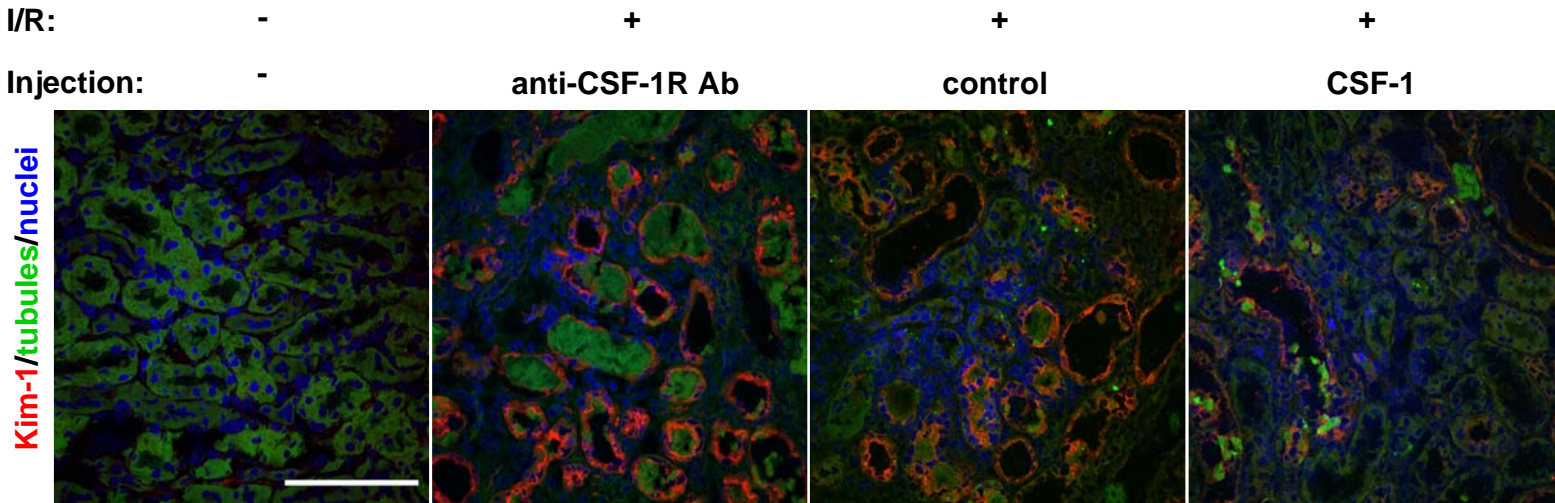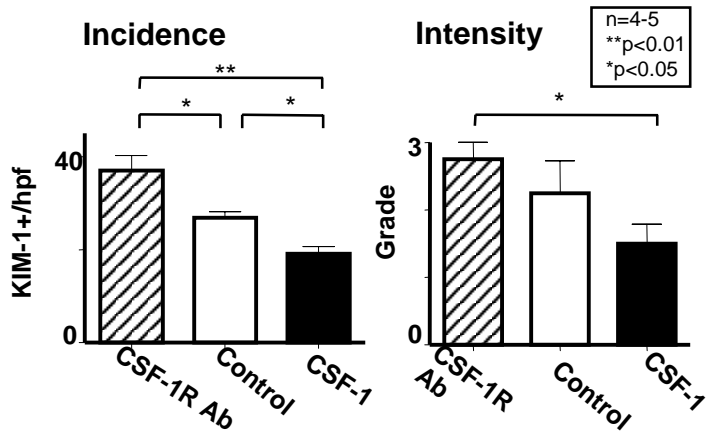

**Supplement Figure 2: KIM-1 expression, a marker for TEC injury, is decreased in TEC during CSF-1-dependent renal repair.** KIM-1 (red) expression is increased in TEC (green) in mice injected with anti-CSF-1R Ab, and is decreased in CSF-1 injected mice after I/R. Nuclei are stained with DAP (blue). The number of KIM-1 positive tubules was determined in 10 randomly selected hpf. The intensity of fluorescence was evaluated in 20 tubules graded from 0 to 3 (0, none; 1, mild; 2, moderate; 3, high). Values are means ± SEM. Representative micrographs. Note the white line represents 100um.

## Intra-renal Mø after I/R

Injected with:

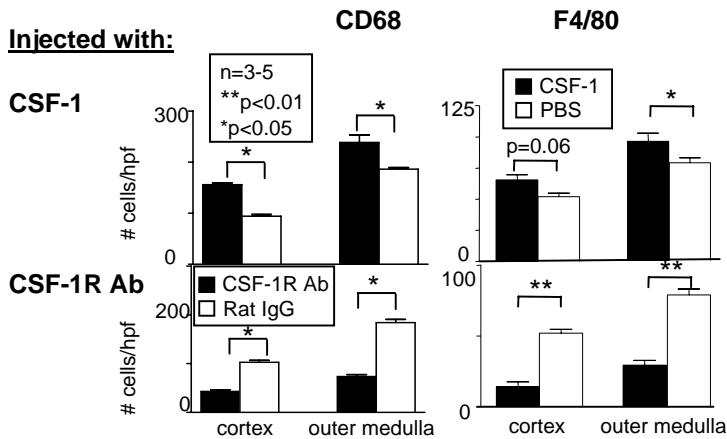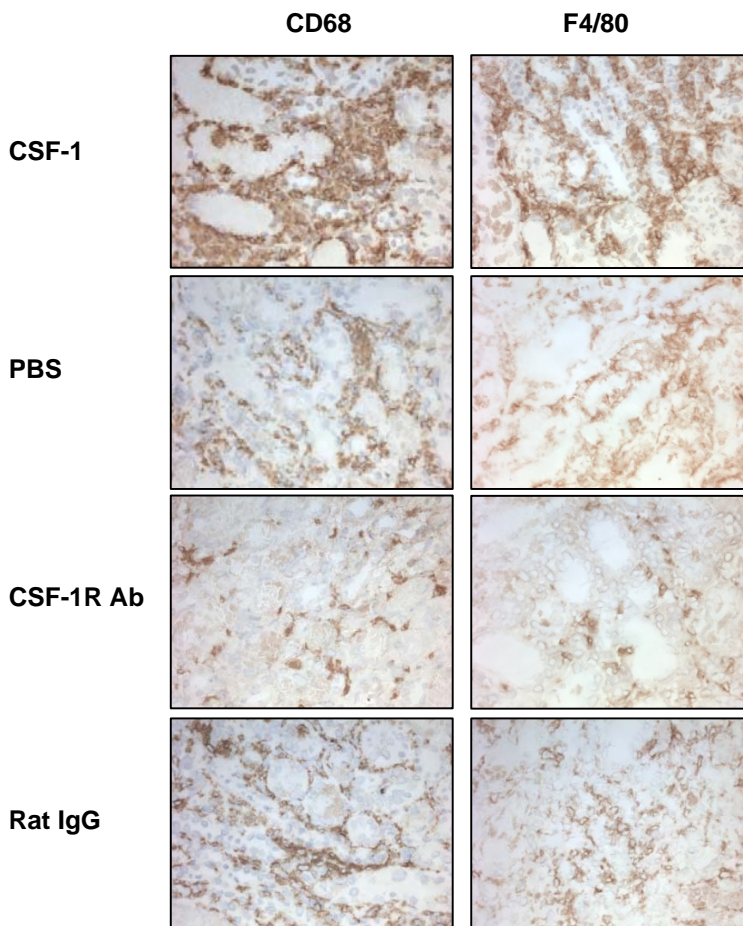

**Supplement Figure 3. Intra-renal Mø are increased in CSF-1 injected mice during hastened renal repair.** Intra-renal Mø (CD68+, F4/80+) are increased in CSF-1 injected mice during hastened renal repair and are decreased in anti-CSF-1R Ab injected mice as compared to controls during retarded repair. CD68+ and F4/80+ Mø (10hpf) were counted in the cortex and outer medulla 5 days after I/R. Means  $\pm$  SEM. Representative photomicrographs (Magnification 40x).

## Eliminating Intra-renal Mø after I/R

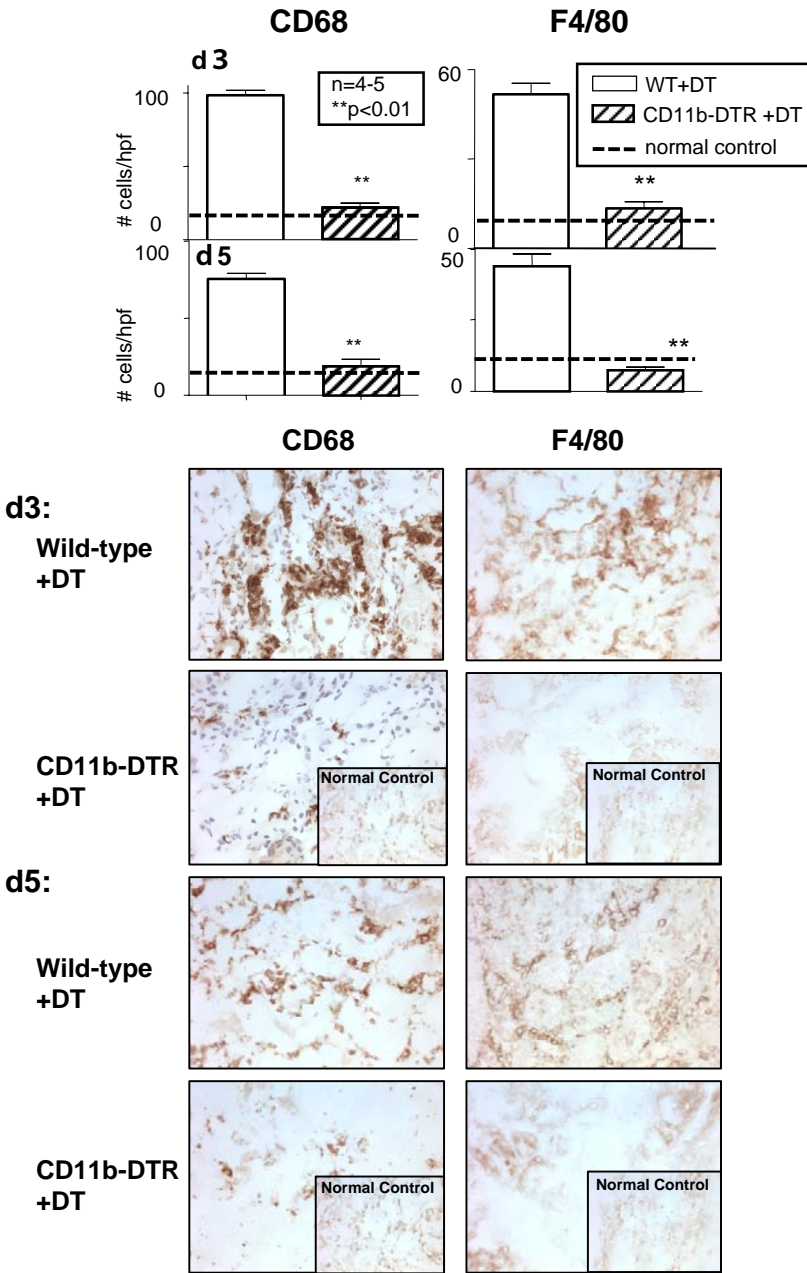

**Supplement Figure 4. Intra-renal Mø that are increased after I/R, are depleted in DT sensitive CD11b-DTR mice.** Injecting DT in CD11b-DTR mice effectively depletes intra-renal Mø (CD68+, F4/80+) after I/R. WT and CD11b-DTR mice were injected with DT at days 1 and 3 after I/R and Mø enumerated at days 3 and 5. Means  $\pm$  SEM. Normal controls are unmanipulated mice. Means  $\pm$  SEM. Representative photomicrographs (Magnification 40x).

**Mouse kidney**  
**CSF-1R / CSF-1 expression-TEC and glomeruli**

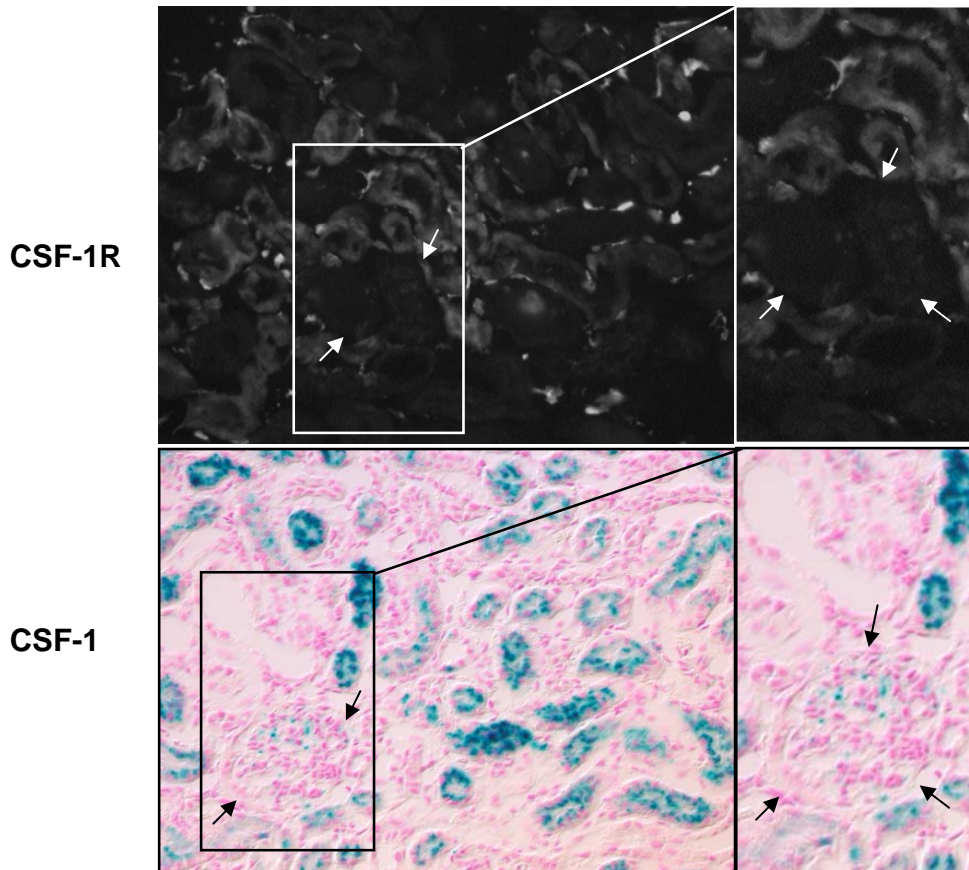

**Supplement Figure 5. Mouse renal parenchymal cell expression of CSF-1 is mainly on TEC, with sparse amounts in glomeruli, while CSF-1R is exclusively on TEC after renal injury.** Kidney sections from mice following I/R from MacGreen mice depicting CSF-1R expression (EGFP) in the top panels and TgZ mice depicting CSF-1 expression (b-gal expression, blue). Note: Mø expression of CSF-1R is far brighter than TEC expression (faint, broad). Magnification 20x, enlargements (40x) Glomeruli indicated with arrows.



## Human CSF-1R<sup>+</sup> TEC (*in vitro*)

### A. CSF-1 mediated survival/proliferation (HK2 cell line)

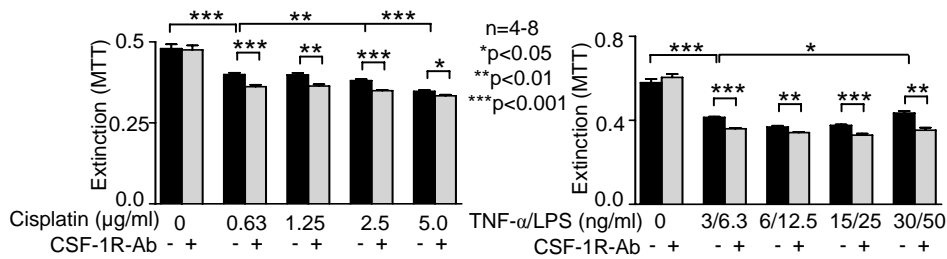

## Mouse CSF-1R<sup>+</sup> TEC (*in vitro*)

### B. CSF-1 mediated proliferation

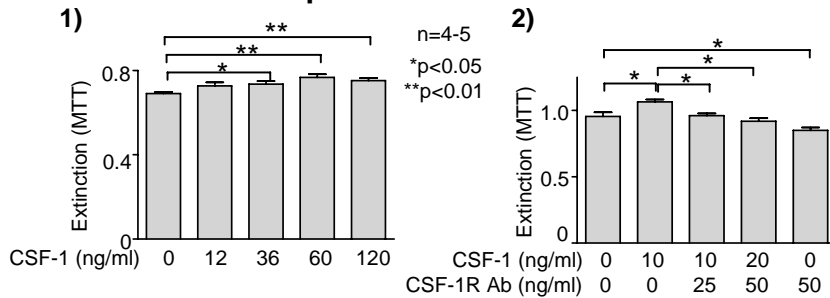

### C. TEC injury - CSF-1 expression

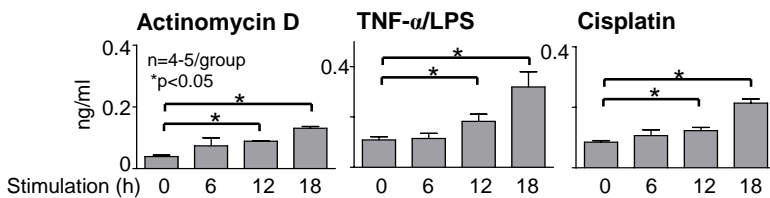

### D. TEC injury; CSF-1 mediated proliferation

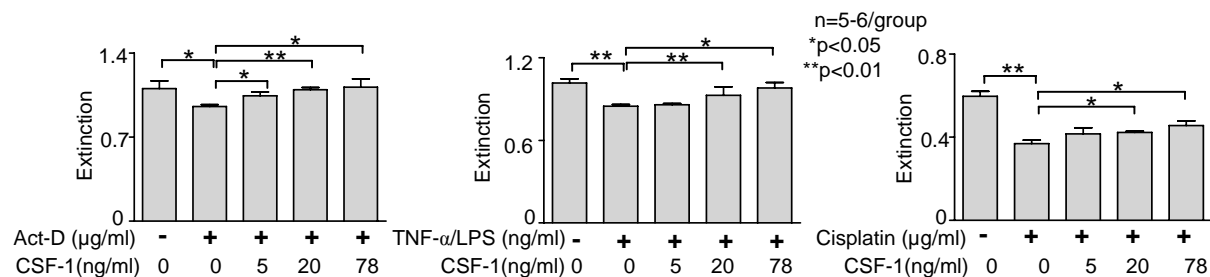

**Supplemental Figure 6. CSF-1R<sup>+</sup> human/mouse TEC are protected from induced apoptosis and proliferate in response to CSF-1.** A. Cisplatin and TNF-α/LPS induced TEC survival/proliferation is CSF-1-mediated. Blocking with CSF-1R Ab (50ng/ml) decreased TEC survival/proliferation following cisplatin or TNF-α/LPS-induced HK2 TEC injury. Means ± SEM. B. 1) CSF-1 mediates TEC survival/proliferation in primary mouse TEC (MTT assay). B. 2) Blocking the CSF-1R reduces primary TEC proliferation (MTT assay). Means ± SEM. C. Actinomycin D (0.05µg/ml), cisplatin (1µg/ml) or TNF-α (6ng/ml)/LPS (12.5ng/ml) treated mouse primary TEC secrete CSF-1. Determination of supernatant CSF-1 by ELISA. Mean ± SEM. C. CSF-1 enhances the survival/proliferation of primary mouse TEC treated with to actinomycin D, cisplatin or TNF-α/LPS (MTT). Means ± SEM.

## Human kidney

### CSF-1R/CSF-1 expression -TEC

CSF-1R

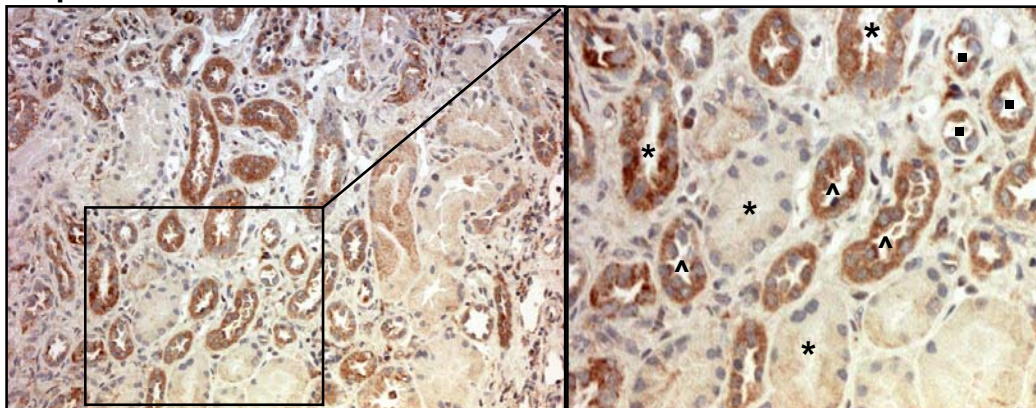

CSF-1

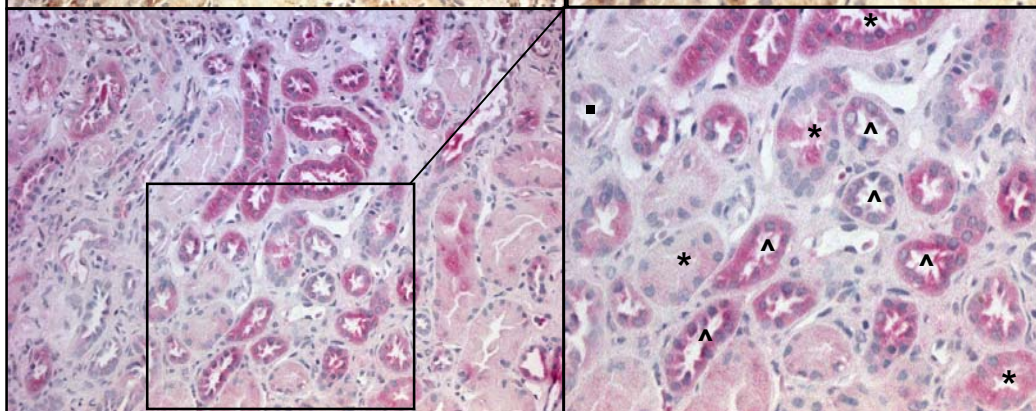

### CSF-1R/CSF-1 expression -Glomeruli

CSF-1R

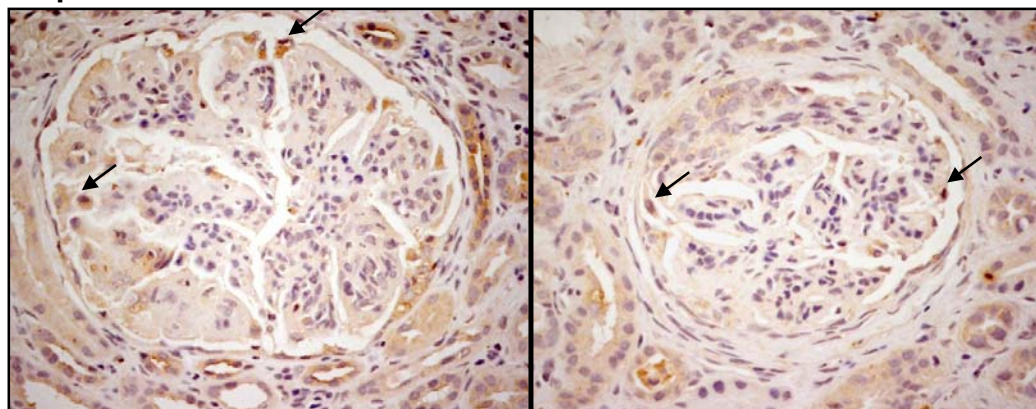

CSF-1

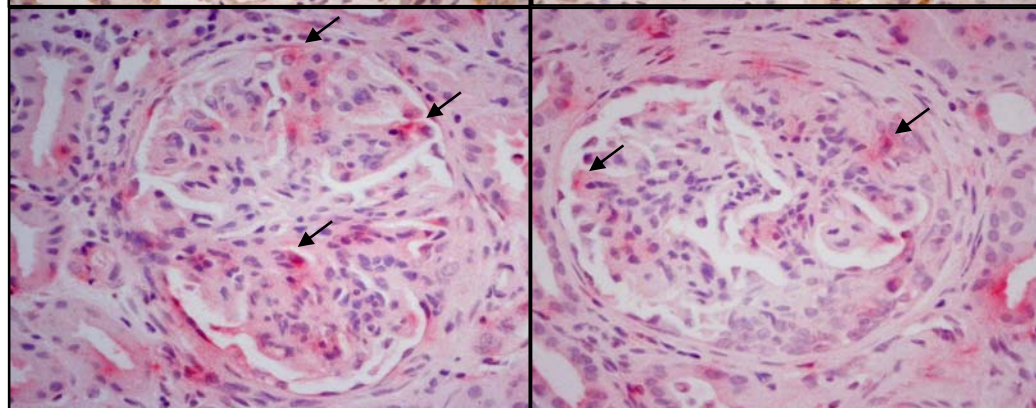

**Supplement Figure 7. CSF-1 and CSF-1R are expressed in human TEC (distal, proximal and loops of Henle). In contrast, CSF-1 expression is sparse in glomeruli, and CSF-1R expression is barely detectable in glomerular parenchymal cells.** The distribution of CSF-1R (brown) and CSF-1 (red) expression was evaluated in sections from patients with impaired renal function and tubular pathology post transplant. We detected CSF-1R and CSF-1 in proximal tubules (\*), distal tubules (^), and loops of Henle (◆). In contrast, CSF-1 expression was sparsely detected in glomeruli (mesangial, podocyte distribution) and the CSF-1R was only occasionally detected on cells in the glomeruli. Magnification 20x, enlargement 40x.

TEC Injury;CSF-1 suppresses apoptosis

A. Human TEC

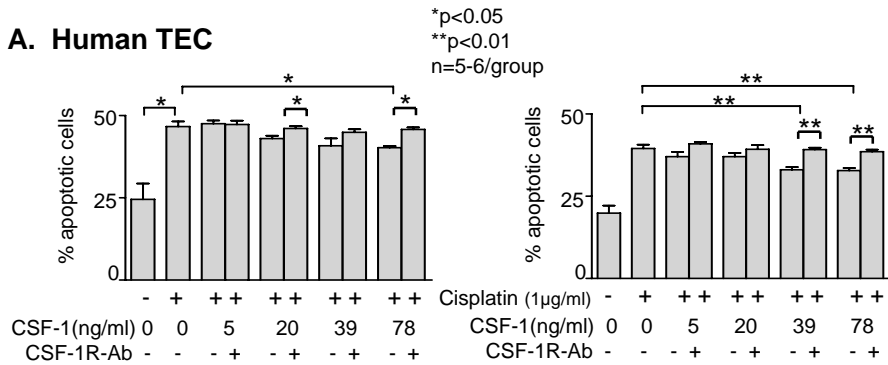

B. Mouse TEC

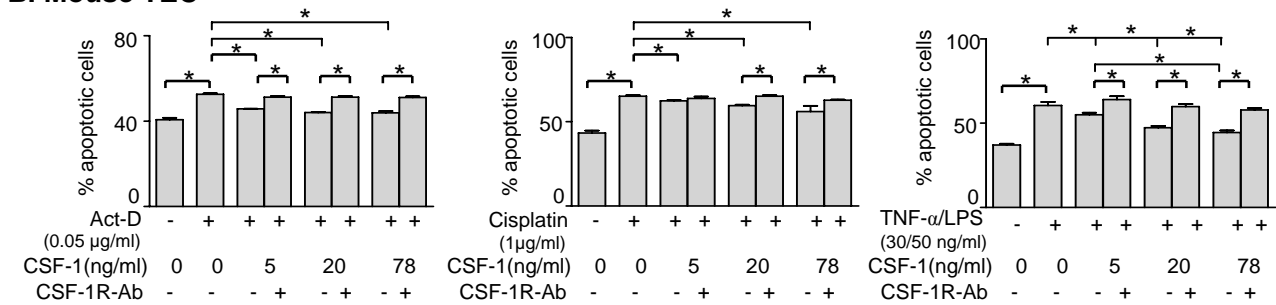

**Supplement Figure 8. CSF-1 counters TEC (human/mouse) apoptosis following injury.** CSF-1 dose-dependent attenuation of actinomycin-D, cisplatin or TNF-α/LPS induced TEC apoptosis (flow cytometry, Annexin-PI). A. Human HK2 TEC; B. Mouse C1 TEC. The CSF-1R was blocked using a specific CSF-1R Ab (50ng/ml) (41). Means ± SEM.
